# Supplementary material
Source: Research Square preprint supplement (doi:10.21203/rs.3.rs-9032012/v1)
Supplement: Supplementary file 1 [file 2af428b3225cb2cac50c5d15.docx]

**Table-4 : The membrane filtration efficiency**

| **Membranes** | **Jw1 (L m-2h-1)** | **Jp (L m-2h-1)** | **Jw2 (L m-2h-1)** |
| --- | --- | --- | --- |
| ZM-0 | 90.49 | 35.35 | 49.49 |
| ZM-1 | 93.32 | 38.88 | 53.73 |
| ZM-2 | 159.07 | 70.7 | 98.98 |
| ZM-3 | 123.72 | 49.28 | 70.7 |
