# Supplementary material
Source: Research Square preprint supplement (doi:10.21203/rs.3.rs-9032012/v1)
Supplement: Supplementary file 2 [file 481e66b2ed1df8e49bb8ee40.docx]

**Supplementary Materials**

*
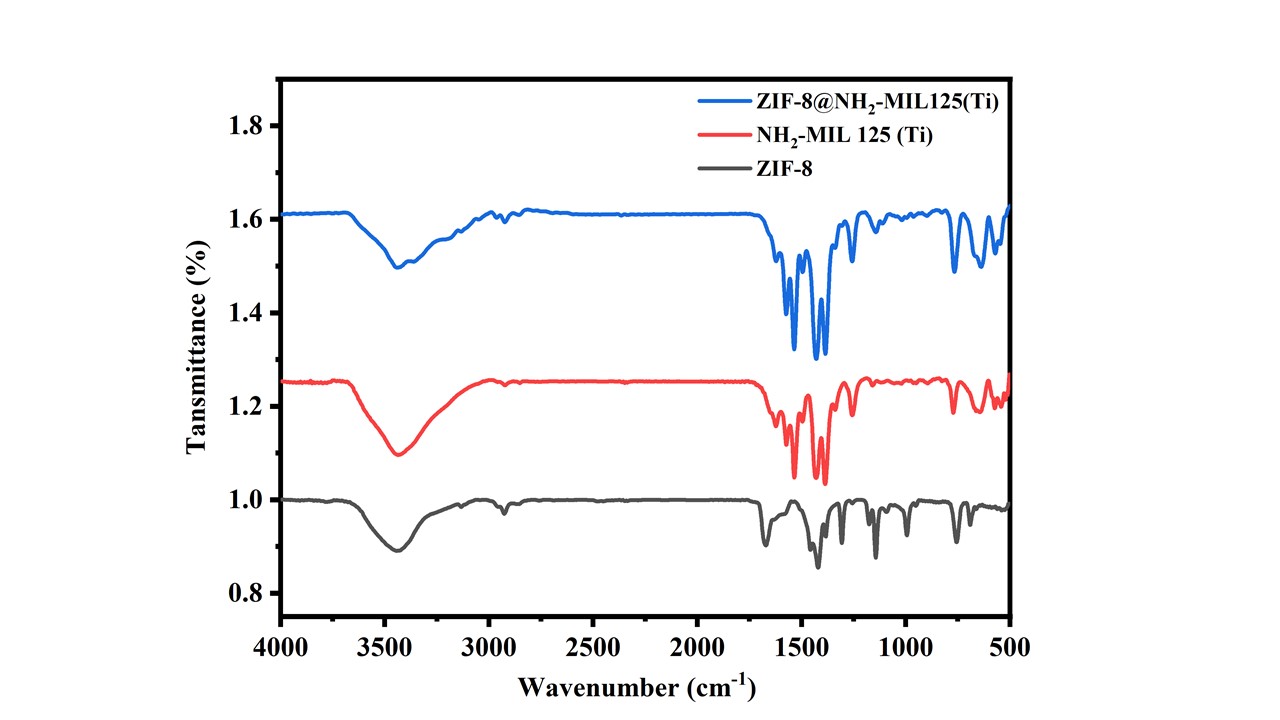
*

SM:1 FTIR spectrum of ZIF-8, NH2-MIL125(Ti), and ZIF8@NH2-MIL125(Ti) composite

*
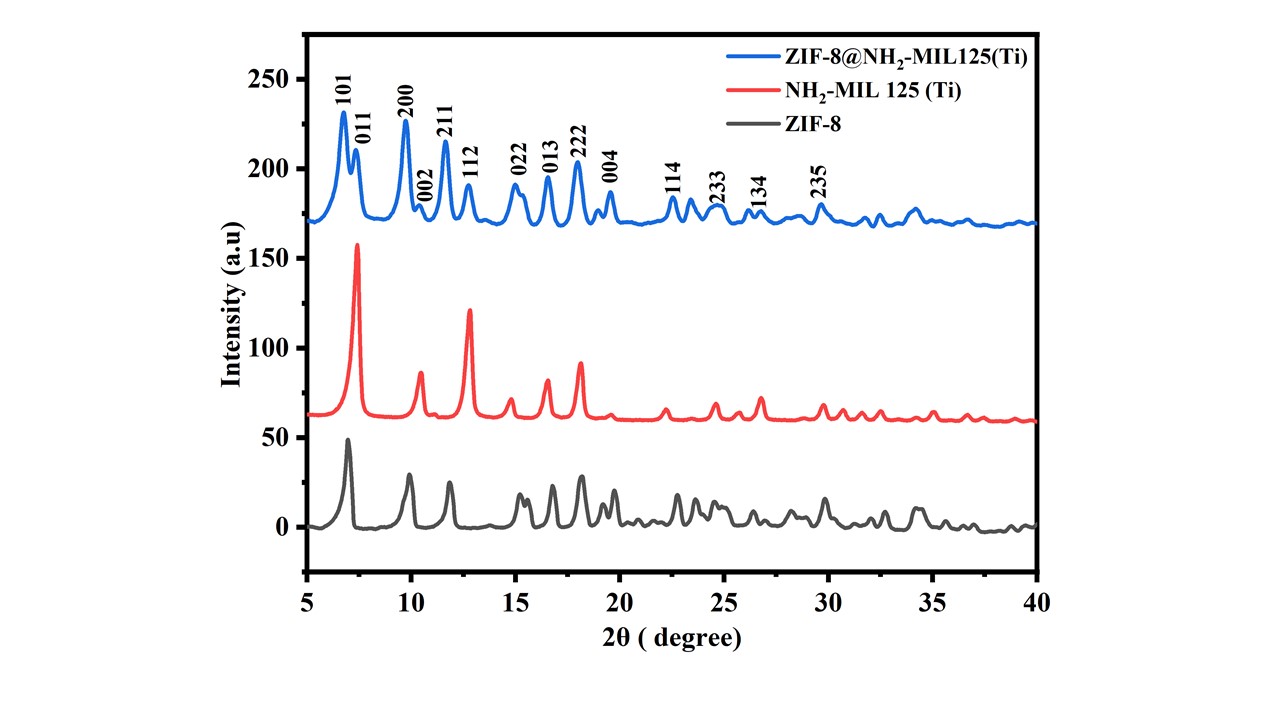
*

SM:2. P-XRD spectrum of ZIF-8, NH2-MIL125(Ti), and ZIF8@NH2-MIL125(Ti) MOF composite


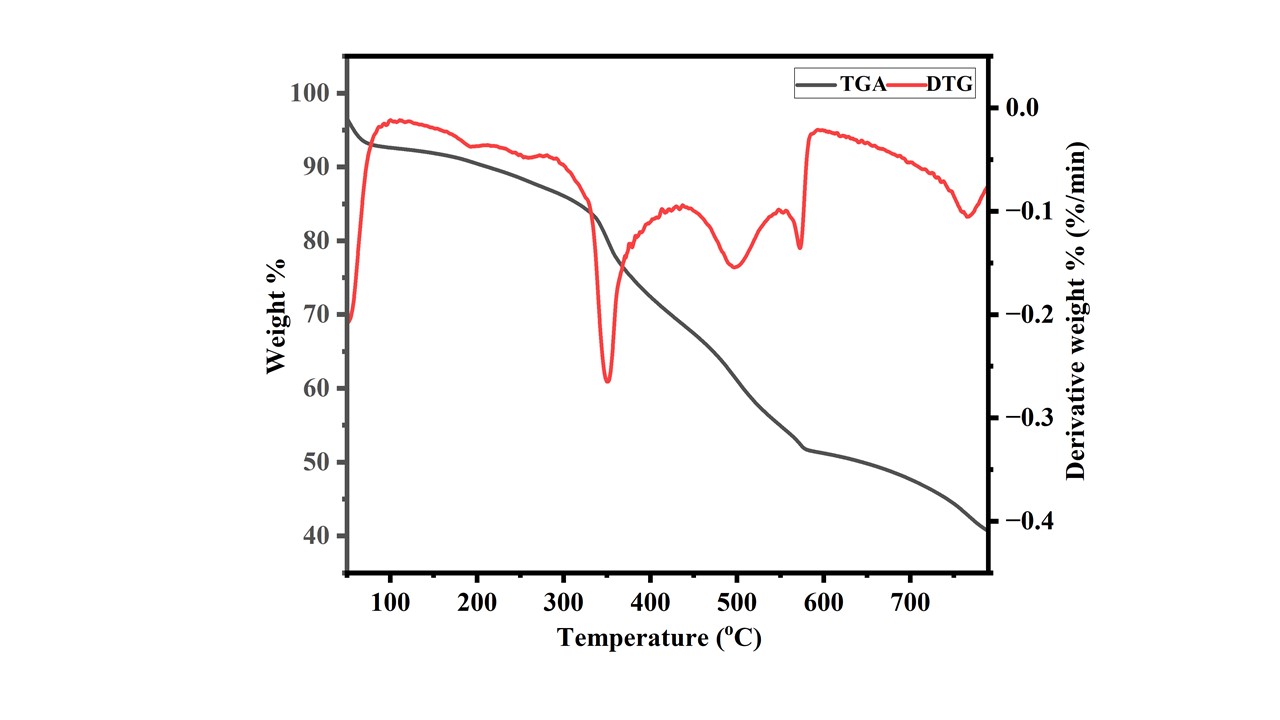


SM:3. TGA-DTG of ZIF-8@NH2-MIL125(Ti) composite

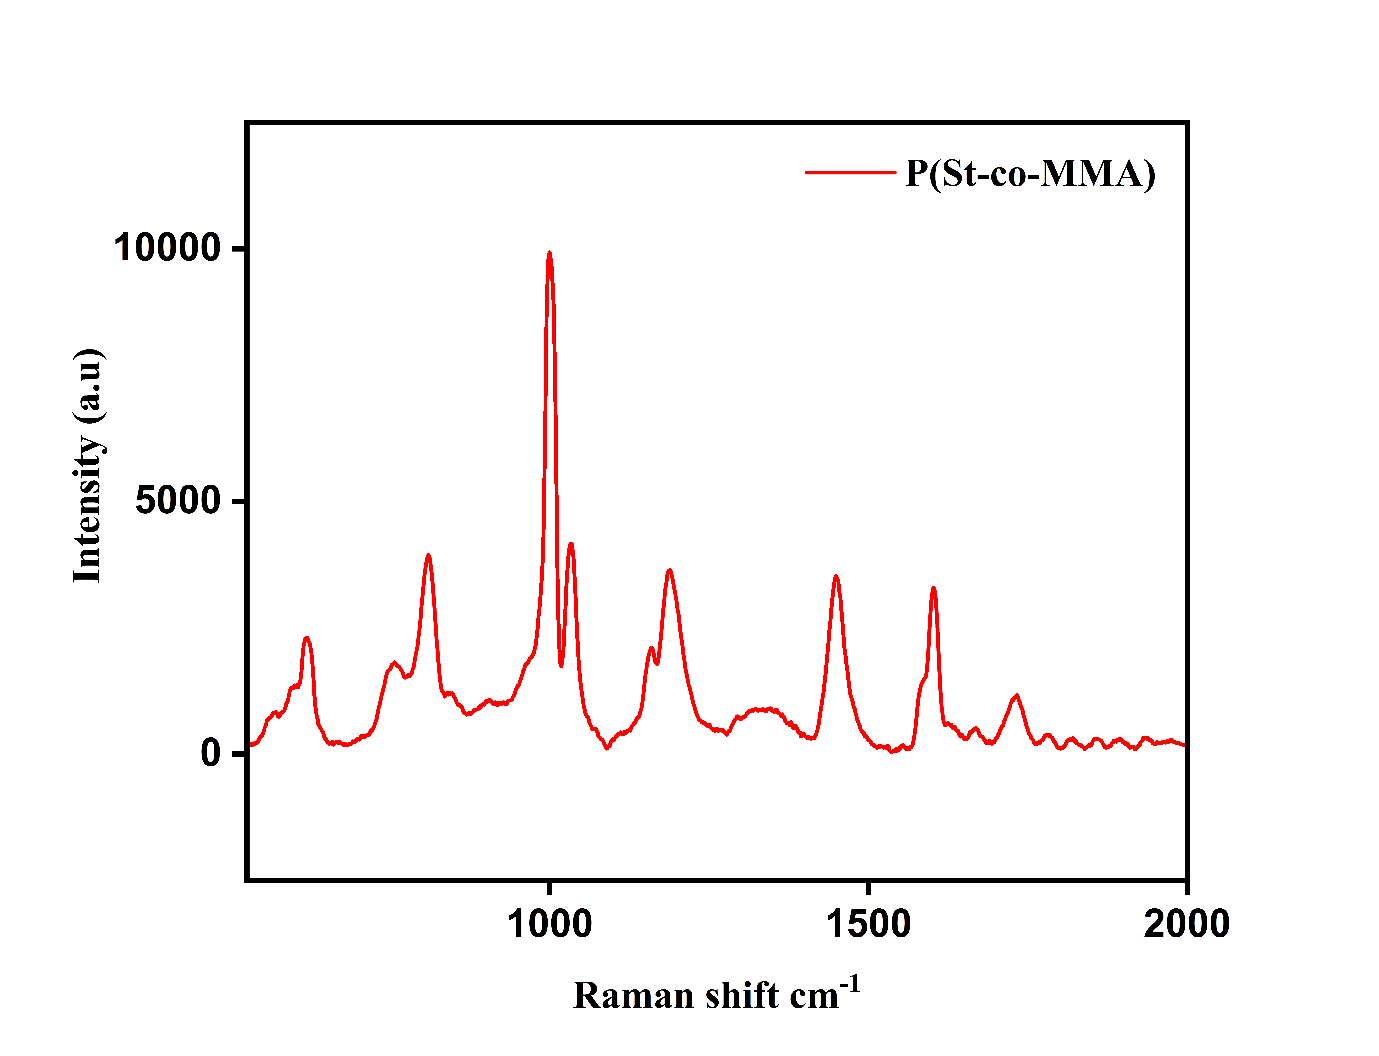


SM:4. Raman spectra of poly (styrene-co-methyl methacrylate) MPs

| **Membranes** | **Average Roughness Ra (nm)** | **RMS Roughness Rq (nm)** |
| --- | --- | --- |
| ZM-0 | 33.30 | 45.08 |
| ZM-2 | 25.88 | 38.45 |

SM:5. Surface roughness of the membrane

**
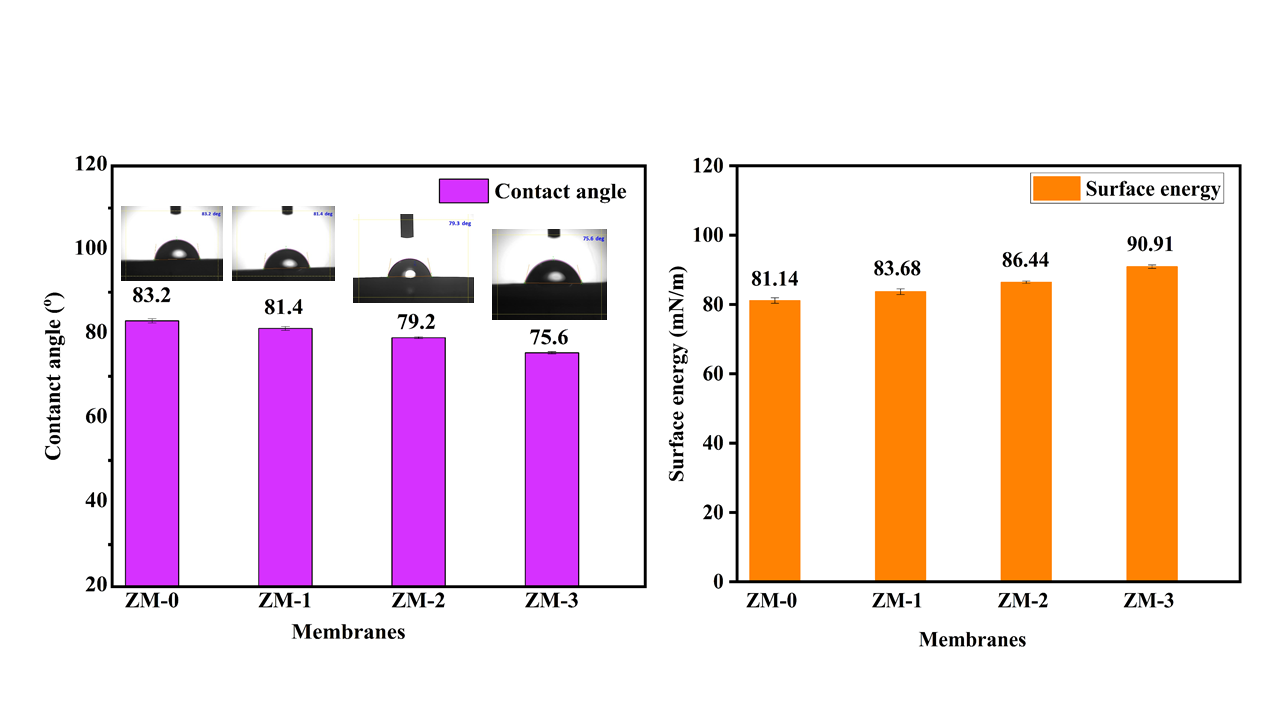
**

SM:6. WCA and surface energy of ZM-0 and ZM-2 HF membranes

##
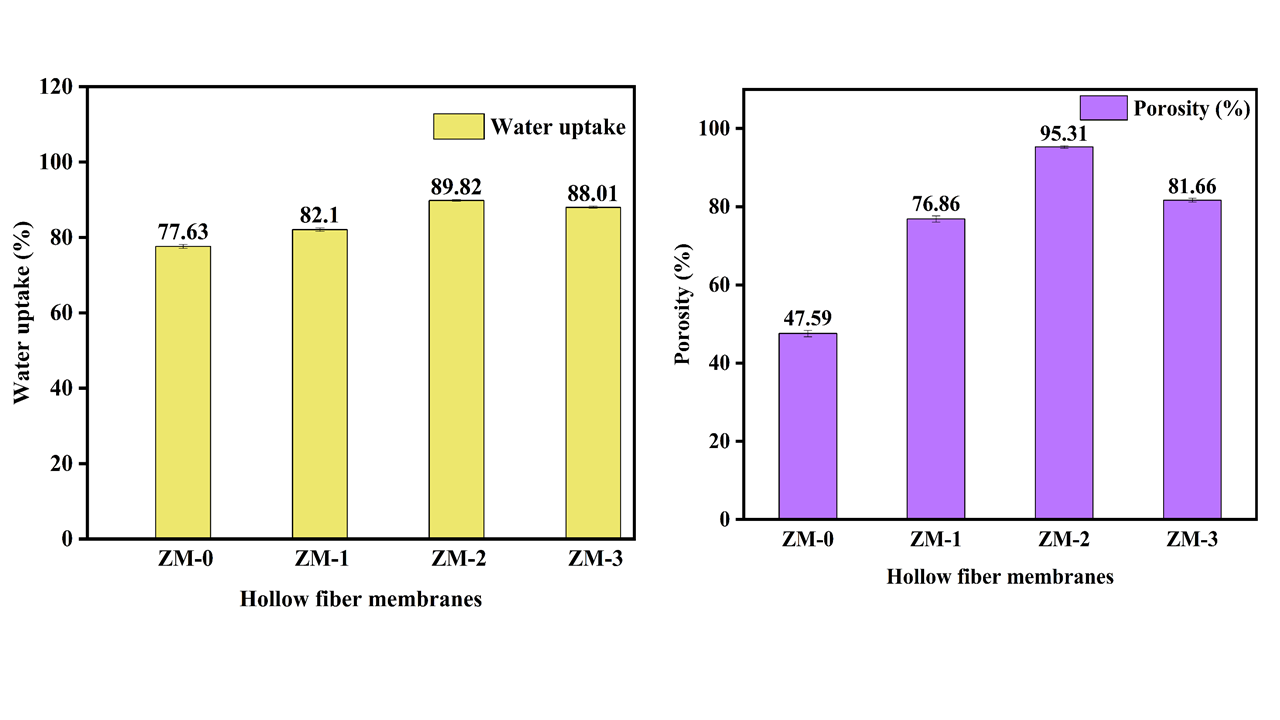


SM:7. Water uptake capacity and porosity of the fabricated membranes


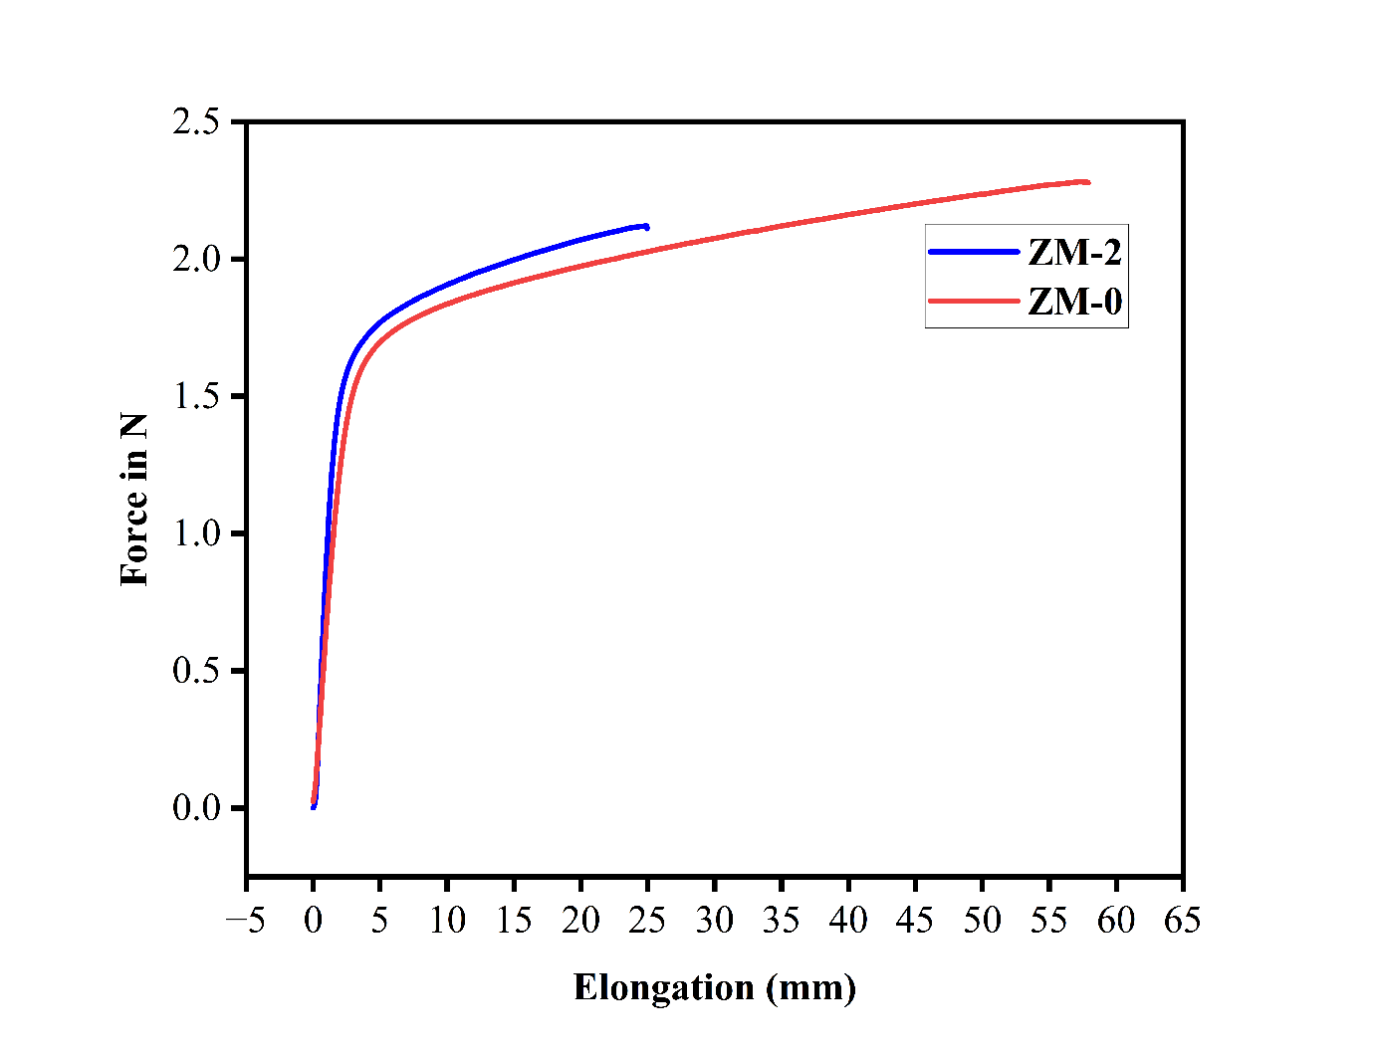


SM:8. Mechanical properties of the neat and optimized membrane


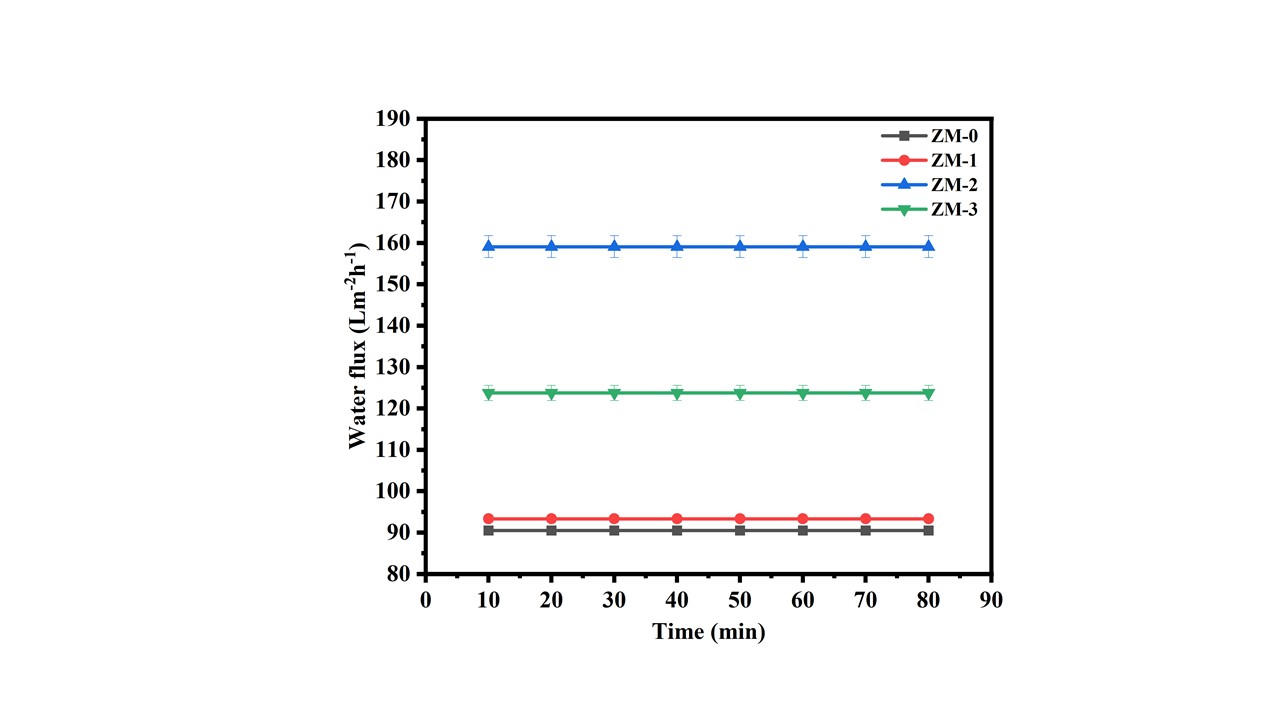


SM:9. Pure water flux (Lm-2h-1)

**
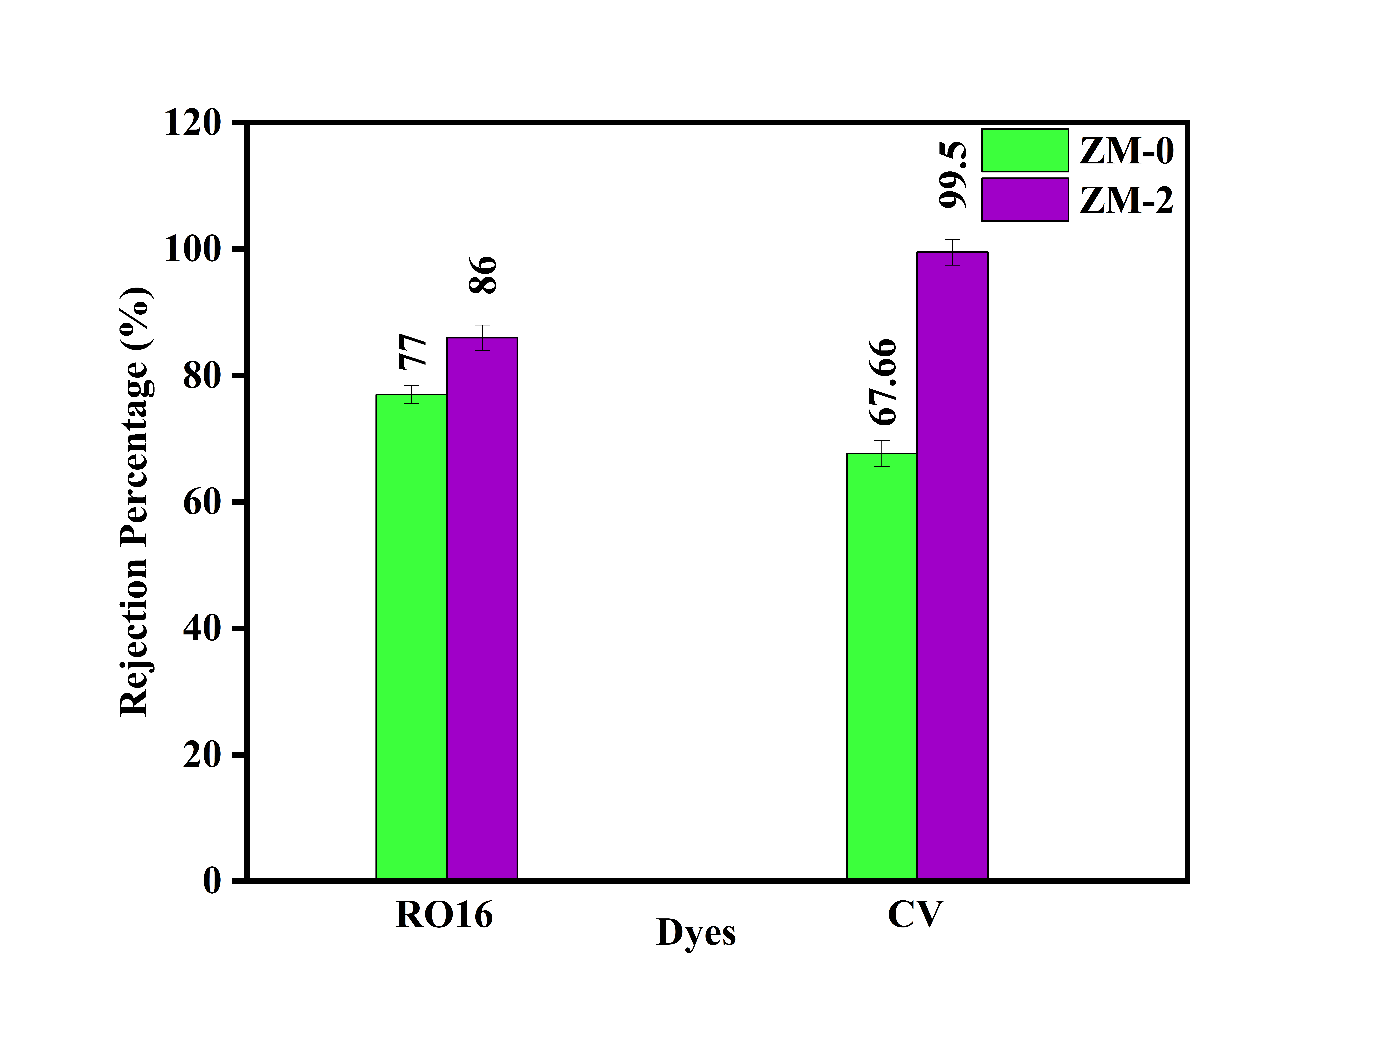
**

SM:10. Rejection of dyes (CV and RO 16)

**
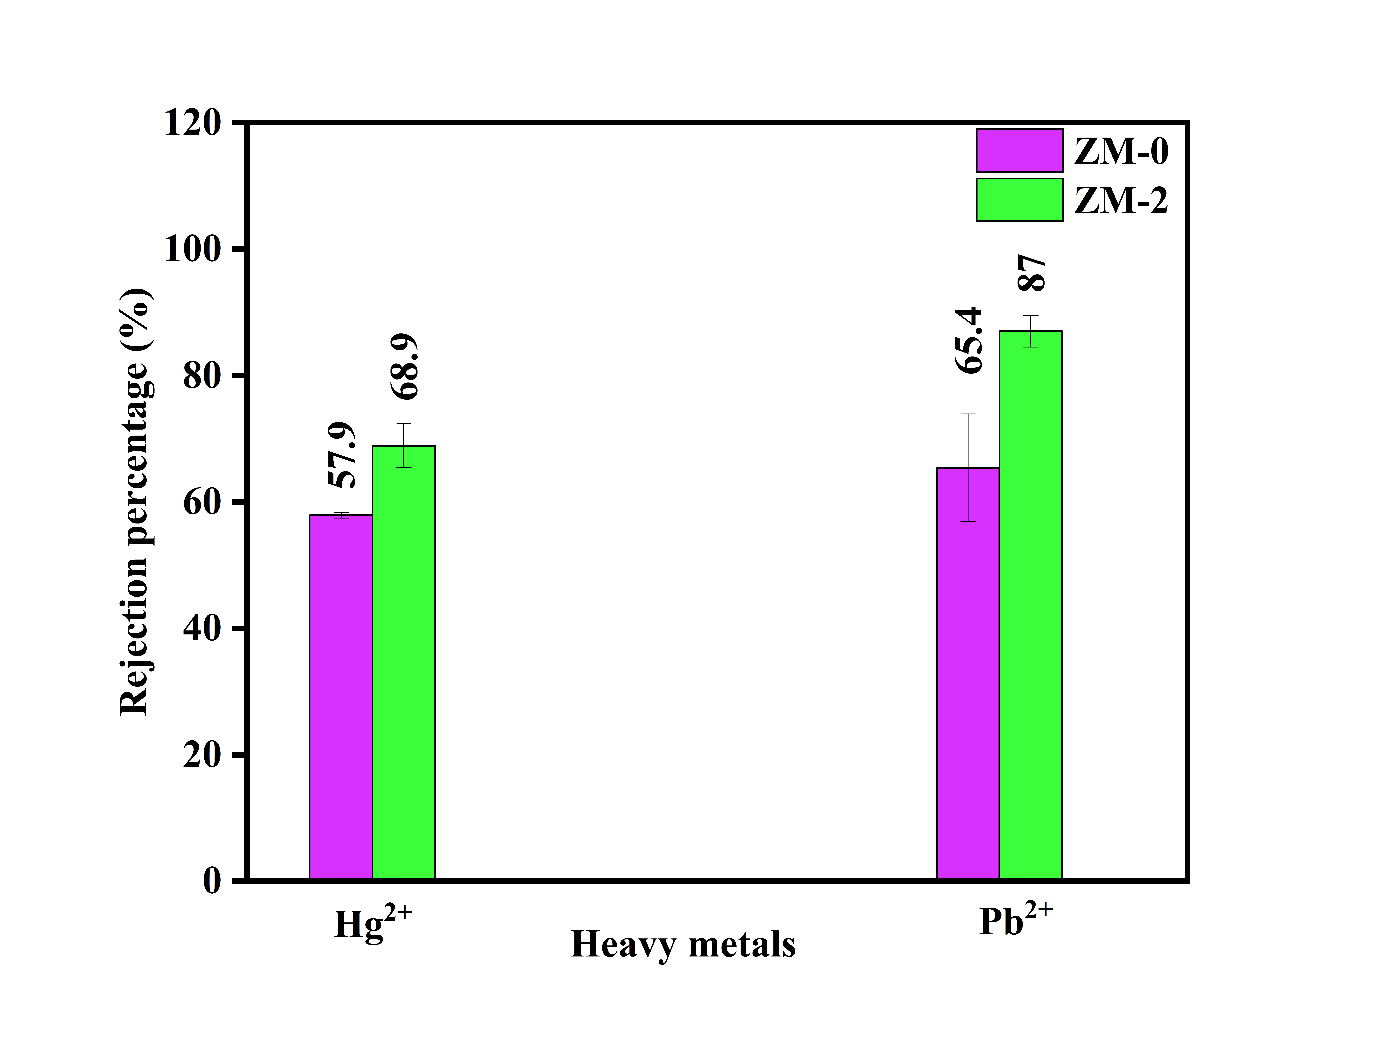
**

SM:11. Rejection of heavy metals (Hg and Pb)


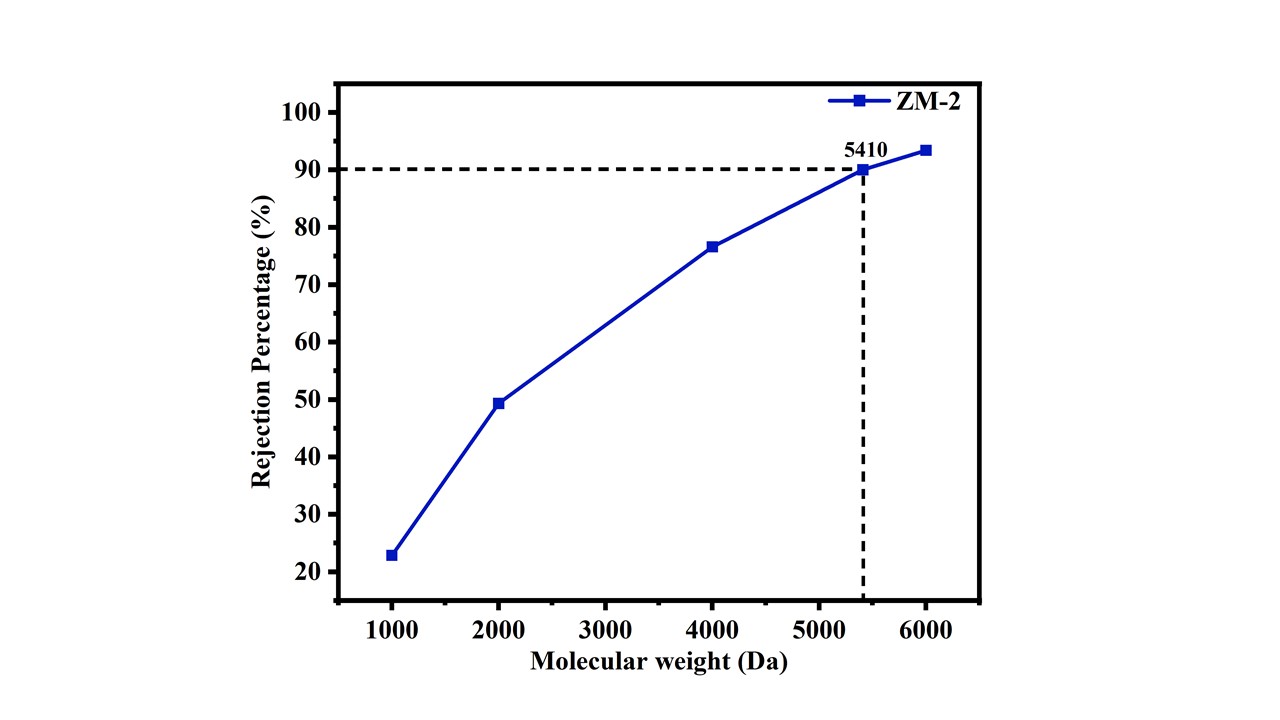


SM:12 MWCO of the optimized membrane
