# Supplementary material
Source: Research Square preprint supplement (doi:10.21203/rs.3.rs-9032012/v1)
Supplement: Supplementary file 3 [file 4f5c4183690efc519463fb67.docx]

**Table-2 : HFMs fabrication parameters**

| **Parameters** | **Conditions** |
| --- | --- |
| Spinneret ID/OD (mm) | 0.55/1.1 |
| Dope solution composition | ZIF-8@NH2-MIL125(Ti)/(PVP/PES/NMP |
| Spinneret temperature (oC) | 27 |
| Dope extrusion rate (mL/min) | 3 |
| Bore fluid composition | H2O |
| Bore extrusion rate (mL/min) | 2.5 |
| Air gap (cm) | 5 |
| Coagulation and rinsing bath | H2O |
| Coagulation bath temperature (oC) | 27 |
| Humidity (%) | 50 - 70 |
| Take up speed (rpm) | 15 - 18 |
