# Supplementary material
Source: Research Square preprint supplement (doi:10.21203/rs.3.rs-9032012/v1)
Supplement: Supplementary file 4 [file 71d7a17ae8a65fd2d0241934.docx]

**Table-1 : HFMs fabrication composition**

| **Type of HFMs** | **PES (g)** | **PVP (g)** | **ZIF8@NH2 -MIL125(Ti) (g)** | **NMP (g)** |
| --- | --- | --- | --- | --- |
| ZM-0 | 20 | 2.0 | 0 | 78 |
| ZM-1 | 20 | 2.0 | 0.02 | 78 |
| ZM-2 | 20 | 2.0 | 0.06 | 78 |
| ZM-3 | 20 | 2.0 | 0.08 | 78 |
