# Supplementary material
Source: Research Square preprint supplement (doi:10.21203/rs.3.rs-9032012/v1)
Supplement: Supplementary file 5 [file 99bbb91483c270ba83df3483.docx]

**Table-3 : Mechanical performance of membranes**

| **Membranes** | **Force at high FH (N)** | **Elongation high EH in %** | **Force at break FB (N)** | **Elongation break EB in %** |
| --- | --- | --- | --- | --- |
| ZM-0 | 1.85 | 52.38 | 1.84 | 52.65 |
| ZM-2 | 2.12 | 41.45 | 2.11 | 41.63 |
