# Supplementary material
Source: Research Square preprint supplement (doi:10.21203/rs.3.rs-9032012/v1)
Supplement: Supplementary file 7 [file f9626686363371b7d54f0716.docx]

**Table 5 Comparison with various MOFs and membranes reported in the previous literature.**

| **Membranes** | **Pollutants** | **Rejection efficacy (%)** | **Flux (Lm-2h-1)** | **Reference** |
| --- | --- | --- | --- | --- |
| ZIF-8/PES | BSA | 99 | 105 | 50 |
| NH2-MIL125(Ti)/F127/PES | BSA | 85.3 | 1511 | 51 |
| NH2-MIL125(Ti)/PVDF | Congo red, Rhodamine B & Ag+1 | 98, 42, & 58 | 693.9 | 52 |
| GO/Ceramic HF | CV | 98.8 | 12.06 | 53 |
| PPSU/CA/Cellulose acetate phthalate | RO16, & RB5 | - | 41.26, 64.47  72.60 | 54 |
| PSU/Poly(styrene-co-maleic anhydride) | Pb2+ & Cd2+ | 91.5 & 72.3 | - | 55 |
| Tannic acid FHNTs, PSU | RO16, & RB5 | >90 & >99 | 92 | 56 |
| **ZIF-8@NH2-MIL 125 (Ti)/PES HFMs** | **P(St-co-MMA) MPs, RO16, CV, Hg2+, and Pb2+** | **97%, 86%, 99.5%, 68.9%, and 87%** | **159.07** | **Present work** |
