# Supplementary material
Source: Research Square preprint supplement (doi:10.21203/rs.3.rs-9032012/v1)

**Graphical abstract**

**
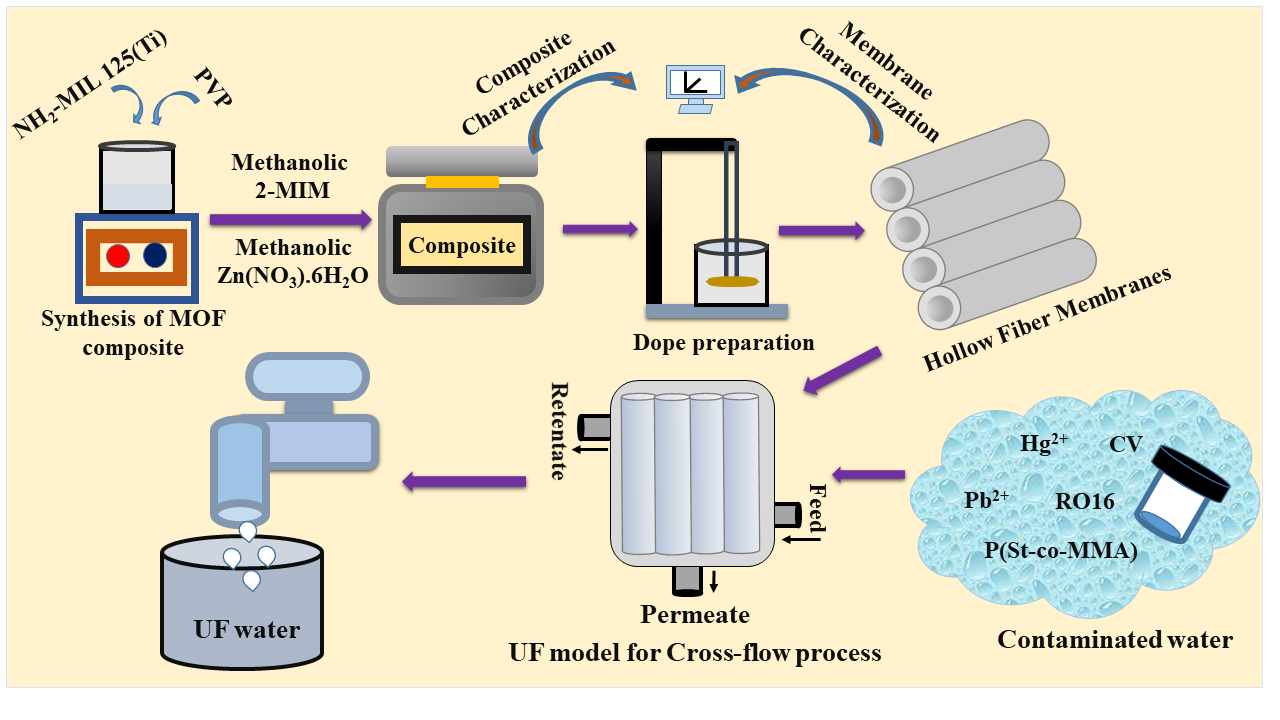
**

Supplement: Supplementary file 6 [file d8fd1cc35bd2fa69a6e2658b.docx]
